# Supplementary material for: The Effect of Cold Treatment of Parboiled Rice with Lowered Glycaemic Potency on Consumer Liking and Acceptability
Source: MDPI journal article supplement (doi:10.3390/foods7120207), 2018-12-16
Supplement: s1 [file s1]

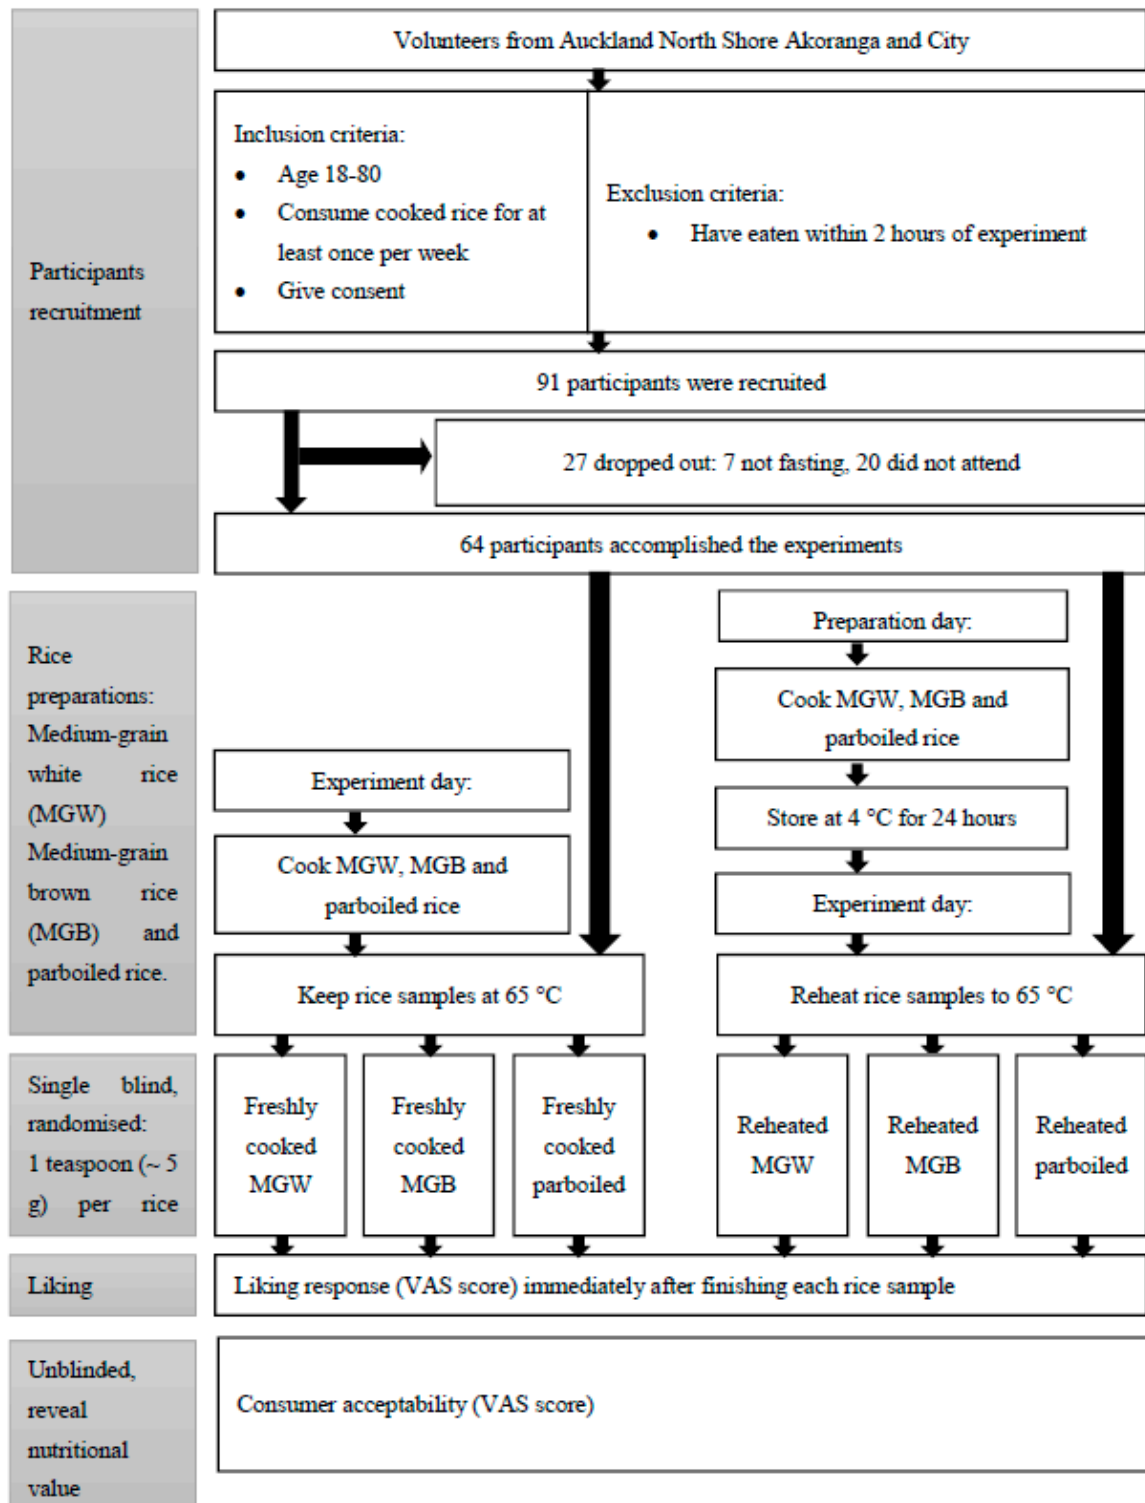

**Figure S1.** Flow chart showing the experimental design for single blind consumer liking and unblinded consumer acceptability.

**Table S1.** Comparison of the starch digestibility profile among six rice samples: Medium grain white, medium brown, parboiled rice, either freshly cooked or prolonged cold treated (at 4 °C for 24 h).

| Rice sample        | Preparation method          | Total available starch (%) <sup>1</sup> | Resistant starch (%) <sup>2</sup> | Rapidly digestible starch (%) <sup>3</sup> | Slowly digestible starch (%) <sup>4</sup> |
|--------------------|-----------------------------|-----------------------------------------|-----------------------------------|--------------------------------------------|-------------------------------------------|
| Medium grain white | Freshly cooked <sup>5</sup> | 66.5 (6.2)                              | 33.5 (6.2)                        | 56.0 (4.5)                                 | 10.5 (1.7)                                |
|                    | Cold treated <sup>6</sup>   | 76.1 (1.6)                              | 23.9 (1.6)                        | 28.4 (0.7)                                 | 47.7 (2.3)                                |
| Medium grain brown | Freshly cooked              | 69.4 (2.3)                              | 30.6 (2.3)                        | 61.1 (4.2)                                 | 8.3 (2.0)                                 |
|                    | Cold treated                | 76.0 (5.0)                              | 24.0 (5.0)                        | 41.8 (1.0)                                 | 34.2 (4.0)                                |
| Parboiled          | Freshly cooked              | 71.6 (2.2)                              | 28.4 (2.2)                        | 42.2 (0.9)                                 | 29.3 (1.3)                                |
|                    | Cold treated                | 34.7 (1.0)                              | 65.3 (1.0)                        | 11.6 (0.2)                                 | 23.1 (1.2)                                |

Note: <sup>1</sup> The total available starch (TAS) was determined as the proportion of the starch that can be digested within 180 minutes of consumption.  $TAS (\%) = \text{starch digested within 180 min (g/100 g rice dry weight basis)} / \text{total starch (TS) (g/100 g rice dry weight basis)} * 100\%$ ; <sup>2</sup> the resistant starch (RS) was determined as the proportion of starch that cannot be digested after 180 minutes following consumption.  $RS (\%) = (TS (\text{g/100 g rice dry weight basis}) - TAS (\text{g/100 g rice dry weight basis})) / TS (\text{g/100 g rice dry weight basis}) * 100\%$ ; <sup>3</sup> the rapidly digestible starch (RDS) was determined as the proportion of starch that can be digested within 20 minutes of consumption.  $RDS (\%) = \text{starch digested within 20 min (g/100 g rice dry weight basis)} / TS (\text{g/100 g rice dry weight basis}) * 100\%$ ; <sup>4</sup> the slowly digestible starch (SDS) was determined as the proportion of the starch that can be digested between 20 and 180 minutes of consumption.  $SDS (\%) = (TAS (\text{g/100 g rice dry weight basis}) - RDS (\text{g/100 g rice dry weight basis})) / TS (\text{g/100 g rice dry weight basis}) * 100\%$ ; <sup>5</sup> freshly cooked preparation method: Rice sample was freshly boiled as described in section 2.2. <sup>6</sup> Cold treated preparation method: Rice was cold treated at 4 °C for 24 h, as described in section 2.2.

**Table S2.** Comparison of the demographic characteristics and rice consumption habits among three clusters.

| Demographic variables                       | Cluster 1 (n=14) | Cluster 2 (n=14) | Cluster 3 (n=36) |
|---------------------------------------------|------------------|------------------|------------------|
| <i>Age group (%)</i>                        |                  |                  |                  |
| 18–35 years                                 | 43.8             | 40.9             | 22.2             |
| 36–55 years                                 | 50.0             | 36.4             | 66.7             |
| 56 years over                               | 6.2              | 22.7             | 11.1             |
| <i>Ethnic group (%)</i>                     |                  |                  |                  |
| European and others                         | 85.6             | 21.8             | 87.0             |
| East Asian                                  | 14.4             | 78.2             | 13.0             |
| <i>Rice consumption (%)</i>                 |                  |                  |                  |
| White rice                                  | 62.5             | 68.2             | 41.8             |
| Brown rice                                  | 37.5             | 31.8             | 58.2             |
| <i>Times per month rice consumption (%)</i> |                  |                  |                  |
| 4 to 10                                     | 75.0             | 21.0             | 16.0             |
| over 10                                     | 25.0             | 79.0             | 84.0             |
| <i>Where consumer prepare rice (%)</i>      |                  |                  |                  |
| Home prepared                               | 31.2             | 27.3             | 63.8             |
| Restaurant and take-away                    | 68.8             | 72.7             | 36.2             |
